# Supplementary material
Source: publisher site journal article supplement (https://www.spandidos-publications.com/2142/downloadSupplementary)

Figure S1. SIRT1 inhibitor decreases cell proliferation and promotes cell apoptosis in a dose-dependent manner. (A) Compared with the control group, SIRT1 inhibitor decreased cell proliferation in a dose-dependent manner. (B) Compared with the control group, SIRT1 inhibitor increased cell apoptosis in a dose-dependent manner. \* $P < 0.05$ . SIRT1, sirtuin 1; PI, propidium iodide.

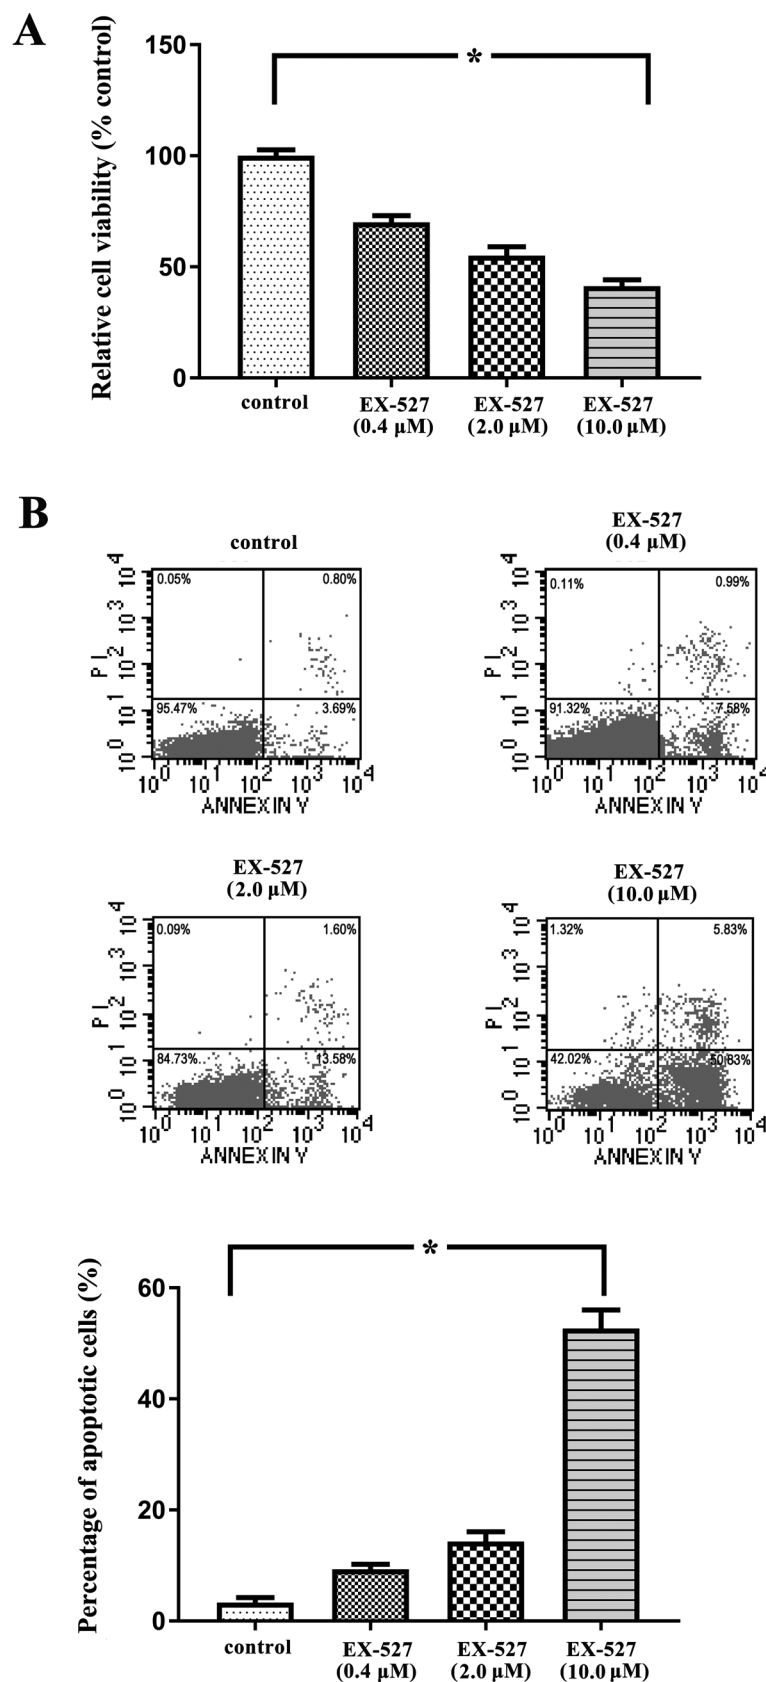

Supplement: Supplementary file 1 [file downloadSupplementary]
